# Supplementary material for: Cooperative participation of CagA and NFATc1 in the pathogenesis of antibiotics-responsive gastric MALT lymphoma
Source: PubMed Central journal article supplement (PMC11575159; doi:10.1186/s12935-024-03552-6), 2024-11-18
Supplement: 12935_2024_3552_MOESM3_ESM.pdf [file 12935_2024_3552_MOESM3_ESM.pdf]

**A****MA-1****Nocodazole\_24H**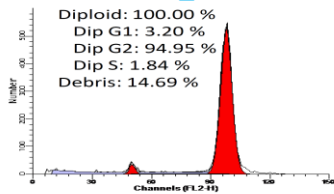**OCI-Ly3****Nocodazole\_24H**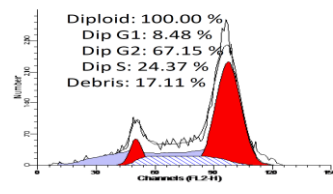**B****Serum free 2H\_control****0.5H\_control****1H\_control****3H\_control****6H\_control****24H\_control****MA-1**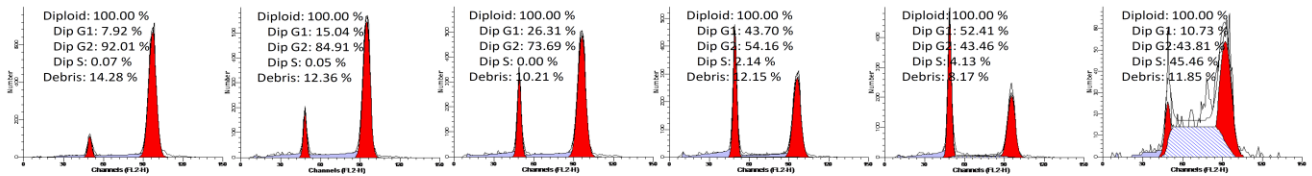**HP infect 2H\_Serum free****HP\_0.5H****HP\_1H****HP\_3H****HP\_6H****HP\_24H**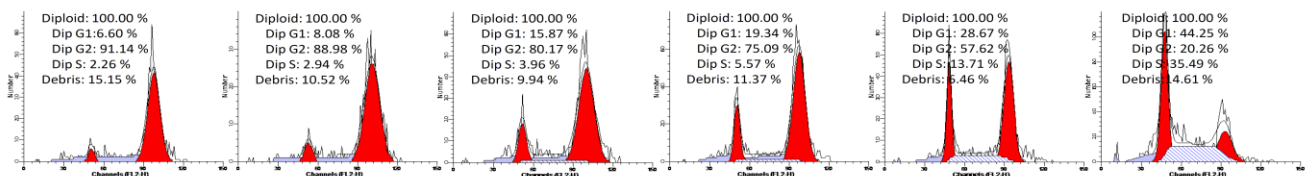**HP+CsA 2H\_Serum free****HP+CsA\_0.5H****HP+CsA\_1H****HP+CsA\_3H****HP+CsA\_6H****HP+CsA\_24H**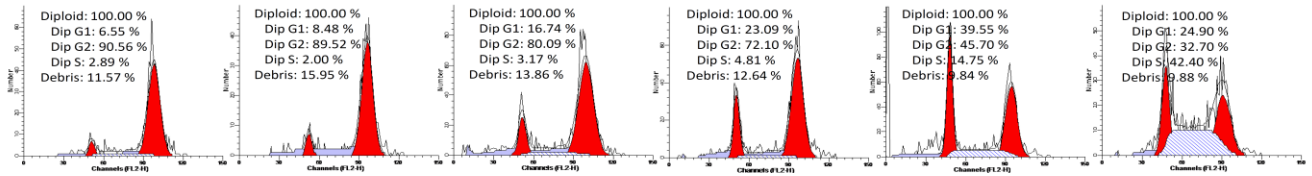**Serum free 2H\_control****0.5H\_control****1H\_control****3H\_control****6H\_control****24H\_control****OCI-Ly3**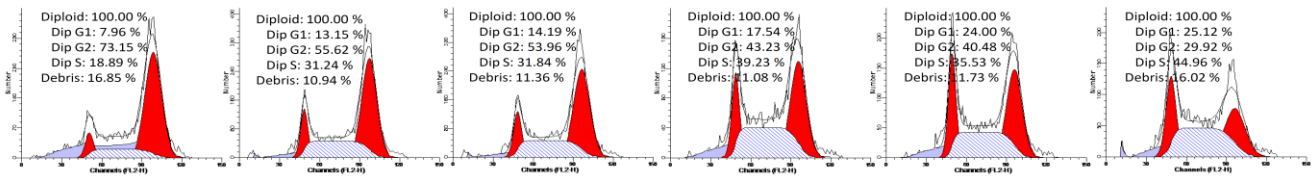**HP infect 2H\_Serum free****HP\_0.5H****HP\_1H****HP\_3H****HP\_6H****HP\_24H**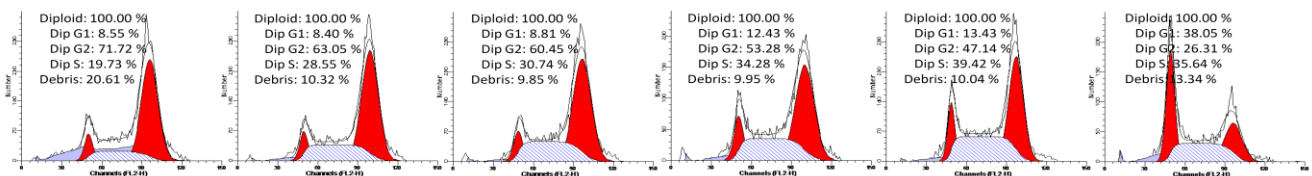**HP+CsA 2H\_Serum free****HP+CsA\_0.5H****HP+CsA\_1H****HP+CsA\_3H****HP+CsA\_6H****HP+CsA\_24H**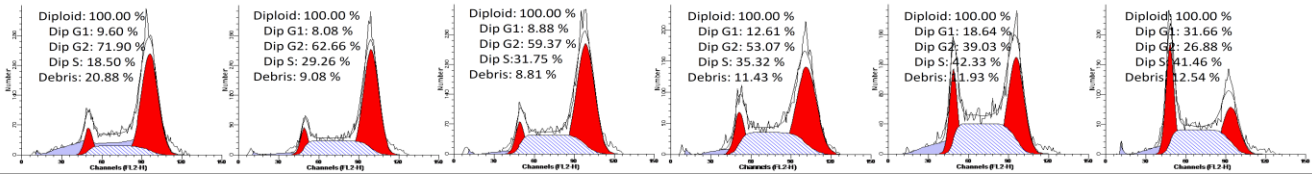

**Supplementary Fig. S3.** (A) The MA-1 cells and OCI-Ly3 cells were synchronized with nocodazole, resulting in most cells being arrested at the G2 phase and serving as controls. (B) Flow cytometric analysis of cell cycle distribution in MA-1 cells (upper panel) and OCI-Ly3 cells (lower panel) co-cultured with or without the HP strain, and the HP strain and cyclosporine A (CsA).
